# Supplementary material for: Salivary DNA Loads for Human Herpesviruses 6 and 7 Are Correlated With Disease Phenotype in Myalgic Encephalomyelitis/Chronic Fatigue Syndrome
Source: PubMed Central journal article supplement (PMC8378328; doi:10.3389/fmed.2021.656692), 2021-08-06
Supplement: Data_Sheet_1.pdf [file Data_Sheet_1.pdf]

## Supplementary Tables

**Supplementary Table 1. Primer and probe sequences.** Assays were performed as duplex assays by incorporation of FAM or HEX reporter labelled probes: HSV1& HSV2; EBV & CMV; HHV6A & HHV6B; HHV7 & HHV8. VZV was performed as a single assay.

| Target               | Forward Primer                | Reverse Primer                   | Probe                                                 |
|----------------------|-------------------------------|----------------------------------|-------------------------------------------------------|
| HSV-1<br>(gD_U56)    | CGGCCGTGTGACACTAT<br>CG       | CTCGTAAAATGGCCCCT<br>CC          | FAM-<br>CCATACCGACCACACCG<br>ACGAACC-BHQ1             |
| HSV-2<br>(gG_U54)    | CGCTCTCGTAAATGCTTC<br>CCT     | TCTACCCACAACAGACC<br>CACG        | HEX-<br>CGCGGAGACATTTCGAGT<br>ACCAGATCG-BHQ1          |
| VZV (DNA polymerase) | CGGCATGGCCCGTCTAT             | TCGCGTGCTGCGGC                   | FAM-<br>ATTTCAGCAATGGAAACA<br>CACGACGCC-BHQ1          |
| EBV (BALF5)          | CGGAAGCCCTCTGGACT<br>TC       | CCCTGTTTATCCGATGG<br>AATG        | FAM-<br>TGTACACGCACGAGAAA<br>TGCGCC-BHQ1              |
| CMV (UL55)           | TGGGCGAGGACAACGAA             | TGAGGCTGGGAAGCTGA<br>CAT         | HEX-<br>TGGGCAACCACCGCACT<br>GAGG-BHQ1                |
| HHV-6A (U67/68)      |                               |                                  | 6FAM-<br>CATTATATATCGAATCTG<br>ACGCTACCTTCCG-BHQ1     |
| HHV-6B (U67/68)      | TTCCGGTATATGACCTTC<br>GTAAGC  | GATGTCTCACCTCCAAA<br>TCTTTAGAAAT | HEX-<br>ACATTATATGTGCAACTT<br>GACACTACCTTCCG-<br>BHQ1 |
| HHV-7<br>(gB_U39)    | TTTCCTGTGACAAAAGA<br>AGCAGTTA | ATCCCACACGCTTTACG<br>GG          | FAM-<br>TTCCTGCGCAATAAAGT<br>GAAAAGTGTAGCATT-<br>BHQ1 |
| HHV-8 (MCP_Orf25)    | CCACCCTCGAATGCACA<br>AC       | GTCGGGATCGGGAAAAG<br>CT          | HEX-<br>CCACCCAGTCAGCCCAG<br>GCACTAAAC-BHQ1           |

Supplementary Table 2. Participants Characteristics of HHV DNA positivity from Plasma and PBMC

|                       | Participant number<br>(n=) | Gender<br>(n=) | Age, median<br>(IQR) | From DNA positive sample |                |                                     |
|-----------------------|----------------------------|----------------|----------------------|--------------------------|----------------|-------------------------------------|
|                       |                            |                |                      | Detected HHV             | Age range (n=) |                                     |
| <b>HC</b>             | Total                      | 76             | F (62)/ M (14)       | 44.0 (32.3-52.8)         |                |                                     |
|                       | DNA negative               | 63             | F (49)/ M (14)       | 46.0 (35.0-54.0)         |                |                                     |
|                       | DNA positive               | 13             | F (13)               | 32.0 (24.0-43.0)         |                |                                     |
|                       |                            |                |                      |                          | EBV            | 18-29 (1)<br>41-60 (2)              |
|                       |                            |                |                      |                          | HHV-6A         | 30-40 (1)                           |
|                       |                            |                |                      |                          | HHV-6B         | 18-29 (1)<br>30-40 (1)              |
|                       |                            |                |                      |                          | HHV-7          | 18-29 (3)<br>30-40 (1)<br>41-60 (2) |
|                       |                            |                |                      |                          | CMV+HHV-7      | 30-40 (1)                           |
| <b>ME/CFS<br/>_MM</b> | Total                      | 99             | F (78)/ M (21)       | 43.0 (35.0-53.0)         |                |                                     |
|                       | DNA negative               | 88             | F (68)/ M (20)       | 43.5 (37.0-52.0)         |                |                                     |
|                       | DNA positive               | 11             | F (10)/ M (1)        | 32.0 (25.0-53.0)         |                |                                     |
|                       |                            |                |                      |                          | EBV            | 41-60 (2)                           |
|                       |                            |                |                      |                          | HHV-7          | 18-29 (4)<br>30-40 (2)<br>41-60 (3) |
| <b>MC/CFS<br/>_SA</b> | Total                      | 33             | F (25) / M (8)       | 48.0 (34.0-53.5)         |                |                                     |
|                       | DNA negative               | 23             | F (15) / M (8)       | 49.0 (39.0-53.0)         |                |                                     |
|                       | DNA positive               | 10             | F (10)               | 36.5 (30.5-55.3)         |                |                                     |
|                       |                            |                |                      |                          | EBV            | 41-60 (1)                           |
|                       |                            |                |                      |                          | HHV-7          | 18-29 (1)<br>30-40 (4)<br>41-60 (2) |
|                       |                            |                |                      |                          | EBV+HHV-7      | 18-29 (1)<br>41-60 (1)              |
| <b>MS</b>             | Total                      | 27             | F (23) / M (4)       | 52.0 (47.0-56.0)         |                |                                     |
|                       | DNA negative               | 26             | F (22) / M (4)       | 51.5 (46.8-56.0)         |                |                                     |
|                       | DNA positive               | 1              | F                    | 53.0 (53.0-53.0)         |                |                                     |
|                       |                            |                |                      |                          | HSV-2          | 41-60 (1)                           |

**Supplementary Table 3: Prevalence of HHV positivity by time in people with ME/CFS and healthy controls.** Borderline significant results ( $0.05 < p < 0.1$ ) are shown in **bold**.

|               |    | Prevalence (%) |               |               | Chi-square     |               |
|---------------|----|----------------|---------------|---------------|----------------|---------------|
|               |    | HC             | ME/CFS_<br>MM | ME/CFS_<br>SA | <i>P value</i> |               |
|               |    |                |               |               | HC vs MM       | HC vs SA      |
| <b>HSV-1</b>  | M1 | 6.25           | 7.14          | 6.25          | 0.9221         | >0.999        |
|               | M2 | 6.67           | 0.00          | 12.50         | 0.3255         | 0.5830        |
|               | M3 | 0.00           | 0.00          | 0.00          | n/a            | n/a           |
|               | M4 | 20.00          | 10.00         | 6.25          | 0.5040         | 0.2538        |
|               | M5 | 0.00           | 0.00          | 0.00          | n/a            | n/a           |
|               | M6 | 7.14           | 0.00          | 13.33         | 0.4123         | 0.5844        |
| <b>EBV</b>    | M1 | 56.25          | 28.57         | 37.50         | 0.1269         | 0.2879        |
|               | M2 | 40.00          | 42.86         | 25.00         | 0.8759         | 0.3719        |
|               | M3 | 42.86          | 38.46         | 25.00         | 0.8163         | 0.3006        |
|               | M4 | 40.00          | 50.00         | 43.75         | 0.6217         | 0.8325        |
|               | M5 | 40.00          | 50.00         | 26.67         | 0.6217         | 0.4386        |
|               | M6 | 28.57          | 33.33         | 33.33         | 0.8086         | 0.7818        |
| <b>HHV-6B</b> | M1 | 25.00          | 28.57         | 56.25         | 0.8253         | <b>0.0719</b> |
|               | M2 | 33.33          | 28.57         | 37.50         | 0.7818         | 0.8085        |
|               | M3 | 14.29          | 46.15         | 43.75         | <b>0.0700</b>  | <b>0.0789</b> |
|               | M4 | 26.67          | 50.00         | 50.00         | 0.2338         | 0.1826        |
|               | M5 | 13.33          | 40.00         | 40.00         | 0.1262         | <b>0.0986</b> |
|               | M6 | 28.57          | 22.22         | 26.67         | 0.7350         | 0.9087        |
| <b>HHV-7</b>  | M1 | 93.75          | 92.86         | 87.50         | 0.9221         | 0.5442        |
|               | M2 | 88.67          | 100.00        | 87.50         | 0.1568         | 0.9449        |
|               | M3 | 85.71          | 92.31         | 87.50         | 0.5860         | 0.8859        |
|               | M4 | 93.33          | 100.00        | 87.50         | 0.4047         | 0.5830        |
|               | M5 | 93.33          | 90.00         | 86.67         | 0.7634         | 0.5428        |
|               | M6 | 85.71          | 100.00        | 86.67         | 0.2354         | 0.9408        |

**Supplementary Table 4. HHV viral load in saliva of participants who were HHV DNA positive in the ddPCR screening assay of plasma and PBMC**

| Participant ID<br>(age/gender) | Detected HHV<br>(sample type) | Median viral load (IQR, copies/ml saliva) for 6 months |                         |                             |                           |
|--------------------------------|-------------------------------|--------------------------------------------------------|-------------------------|-----------------------------|---------------------------|
|                                |                               | HSV-1                                                  | EBV                     | HHV-6B                      | HHV-7                     |
| <b>HC</b>                      | 6070 (18/F)                   | 0                                                      | 4080<br>(0-60300)       | 161700<br>(1208500-2889315) | 29348<br>(18095-39050)    |
|                                | 8036 (44/F)                   | 0                                                      | 0<br>(0-58560)          | 0                           | 10500<br>(8313-12556)     |
|                                | 13006 (42/F)                  | 0                                                      | 0<br>(0-8208)           | 0<br>(0-108)                | 0                         |
|                                | 13018 (23/F) *                | 0                                                      | 4500                    | 0                           | 26333                     |
|                                | 13025 (32/F)                  | 0                                                      | 0                       | 580<br>(0-790.4)            | 3900<br>(2691-4855)       |
| <b>ME/<br/>CFS_<br/>MM</b>     | 1030 (42/F)                   | 0                                                      | 0<br>(0-2850)           | 0<br>(0-660)                | 261300<br>(129183-576350) |
|                                | 7079 (53/F)                   | 0                                                      | 80242<br>(10291-197375) | 0                           | 1917<br>(1423-3311)       |
| <b>ME/<br/>CFS_<br/>SA</b>     | 6041 (35/F)                   | 0<br>(0-1068750)                                       | 0<br>(0-1319)           | 2097<br>(1698-2887)         | 37470<br>(23010-50297)    |
|                                | 6046 (32/F)                   | 0                                                      | 14329<br>(0-424833)     | 0<br>(0-575.5)              | 22500<br>(15583-30427)    |
|                                | 6049 (55/F)                   | 0<br>(0-19755)                                         | 14738<br>(0-44250)      | 72<br>(0-489)               | 46287<br>(37275-61250)    |
|                                | 6052 (57/F)                   | 0                                                      | 0<br>(0-445)            | 0<br>(0-690)                | 13400<br>(9650-17550)     |
|                                | 6068 (18/F)                   | 0                                                      | 10800<br>(0-26152)      | 2023<br>(1652-2847)         | 50630<br>(36745-62950)    |

\*One time visited

**Supplementary Table 5. Age related HHV viral load in saliva**

|                       |          | <b>Median viral load (IQR, copies/ml saliva) for 6 months</b> |                       |         |                        |         |                         |         |
|-----------------------|----------|---------------------------------------------------------------|-----------------------|---------|------------------------|---------|-------------------------|---------|
|                       |          | n                                                             | EBV                   | P value | HHV-6B                 | P value | HHV-7                   | P value |
| <b>HC</b>             | UNDER 40 | 6                                                             | 2040<br>(0.0-26225)   | 0.696   | 290.0<br>(0-405100)    | 0.036   | 27841<br>(4100 -37763)  | 0.147   |
|                       | OVER 40  | 10                                                            | 0.0<br>(0.0-7077)     |         | 0.0<br>(0.0 - 0.0)     |         | 7330<br>(661.3-19475)   |         |
| <b>ME/CFS_<br/>MM</b> | UNDER 40 | 4                                                             | 0.0<br>(0.0 - 0.0)    | 0.296   | 591.6<br>(145.8-770.5) | 0.031   | 11571<br>(2633-35777)   | 0.142   |
|                       | OVER 40  | 10                                                            | 0.0<br>(0.0 - 146063) |         | 0.0<br>(0.0 -0.0)      |         | 70375<br>(4192-103187)  |         |
| <b>ME/CFS_<br/>SA</b> | UNDER 40 | 7                                                             | 0.0<br>(0.0 - 10800)  | 0.677   | 2023.0<br>(0.0-2225)   | 0.132   | 23276<br>(13480 -50630) | 0.516   |
|                       | OVER 40  | 9                                                             | 0.0<br>(0.0 - 7369)   |         | 0.0<br>(0.0 – 156.0)   |         | 13400<br>(2934-95087)   |         |

Supplementary Table 6. Concurrent salivary HHV distribution over time

| HC (n=)                   | Month1 | Month2 | Month3 | Month4 | Month5 | Month6 |
|---------------------------|--------|--------|--------|--------|--------|--------|
| 1 not detected            | -      | 1      | 1      | 1      | 1      | 1      |
| 2 EBV only                | 1      | 1      | 1      | -      | -      | -      |
| 3 HHV-6B ONLY             | -      | -      | -      | -      | -      | 1      |
| 4 HHV-7 only              | 6      | 5      | 6      | 7      | 7      | 4      |
| 5 HHV-7+HHV-6B            | -      | 2      | 1      | 1      | 1      | 3      |
| 6 HHV-7+EBV               | 5      | 2      | 4      | 1      | 5      | 4      |
| 7 HHV-7+HHV-6B+EBV        | 3      | 3      | 1      | 2      | 1      | -      |
| 8 HHV-7+HHV-6B+HSV-1      | 1      | -      | -      | -      | -      | -      |
| 9 HHV-7+EBV+HSV-1         | -      | -      | -      | 2      | -      | -      |
| 10 HHV-7+HSV-1            | -      | 1      | -      | -      | -      | 1      |
| 11 HSV-1+ EBV             | -      | -      | -      | -      | -      | -      |
| 12 HSV-1+EBV+HHV-6B+HHV-7 | -      | -      | -      | 1      | -      | -      |
|                           | 16     | 15     | 14     | 15     | 15     | 14     |

| ME/CFS_MM (n=)            | Month1 | Month2 | Month3 | Month4 | Month5 | Month6 |
|---------------------------|--------|--------|--------|--------|--------|--------|
| 1 not detected            | 1      | -      | -      | -      | 1      | -      |
| 2 EBV only                | -      | -      | -      | -      | -      | -      |
| 3 HHV-6B only             | -      | -      | 1      | -      | -      | -      |
| 4 HHV-7 only              | 6      | 5      | 3      | 1      | 1      | 4      |
| 5 HHV-7+HHV-6B            | 3      | 3      | 4      | 2      | 3      | 2      |
| 6 HHV-7+EBV               | 2      | 5      | 4      | 4      | 4      | 3      |
| 7 HHV-7+HHV-6B+EBV        | 1      | 1      | 1      | 2      | 1      | -      |
| 8 HHV-7+HHV-6B+HSV-1      | -      | -      | -      | 1      | -      | -      |
| 9 HHV-7+EBV+HSV-1         | 1      | -      | -      | -      | -      | -      |
| 10 HHV-7+HSV-1            | -      | -      | -      | -      | -      | -      |
| 11 HSV-1+EBV              | -      | -      | -      | -      | -      | -      |
| 12 HSV-1+EBV+HHV-6B+HHV-7 | -      | -      | -      | -      | -      | -      |
|                           | 14     | 14     | 13     | 10     | 10     | 9      |

| ME/CFS_SA (n=)            | Month1 | Month2 | Month3 | Month4 | Month5 | Month6 |
|---------------------------|--------|--------|--------|--------|--------|--------|
| 1 not detected            | 1      | 1      | 1      | 1      | 1      | 1      |
| 2 EBV only                | 1      | -      | 1      | -      | 1      | -      |
| 3 HHV-6B only             | -      | -      | -      | -      | -      | -      |
| 4 HHV-7 only              | 4      | 6      | 6      | 5      | 4      | 7      |
| 5 HHV-7+HHV-6B            | 5      | 4      | 5      | 3      | 6      | 2      |
| 6 HHV-7+EBV               | 1      | 1      | 1      | 1      | 3      | 2      |
| 7 HHV-7+HHV-6B+EBV        | 3      | 2      | 2      | 5      | -      | 1      |
| 8 HHV-7+HHV-6B+HSV-1      | 1      | -      | -      | -      | -      | -      |
| 9 HHV-7+EBV+HSV-1         | -      | -      | -      | -      | -      | -      |
| 10 HHV-7+HSV-1            | -      | 1      | -      | -      | -      | -      |
| 11 HSV-1+EBV              | -      | 1      | -      | 1      | -      | 1      |
| 12 HSV-1+EBV+HHV-6B+HHV-7 | -      | -      | -      | -      | -      | 1      |
|                           | 16     | 16     | 16     | 16     | 15     | 15     |

**Supplementary Table 7. The R value of Spearman's analysis between HHV virus and ME/CFS symptom scores from ME/CFS\_SA**

|                                                                                                 | Spearman r | HSV-1    | EBV      | HHV-6B    | HHV-7    | PEM      | Sleepdysf | Pain     | Neurocog | Autonomic | Neuroendo | Immune |
|-------------------------------------------------------------------------------------------------|------------|----------|----------|-----------|----------|----------|-----------|----------|----------|-----------|-----------|--------|
| <b>ME/CFS_SA-<br/>pattern 1<br/>Fluctuating<br/>repertoire<br/>(n = 8)</b>                      | HSV-1      | 1        |          |           |          |          |           |          |          |           |           |        |
|                                                                                                 | EBV        | -0.033   | 1        |           |          |          |           |          |          |           |           |        |
|                                                                                                 | HHV-6B     | 0.055    | 0.096    | 1         |          |          |           |          |          |           |           |        |
|                                                                                                 | HHV-7      | 0.102    | 0.253    | 0.167     | 1        |          |           |          |          |           |           |        |
|                                                                                                 | PEM        | 0.232    | -0.022   | 0.284     | 0.202    | 1        |           |          |          |           |           |        |
|                                                                                                 | Sleepdysf  | -0.122   | -0.182   | 0.472***  | -0.202   | 0.120    | 1         |          |          |           |           |        |
|                                                                                                 | Pain       | 0.158    | 0.100    | 0.522***  | 0.491*** | 0.646*** | -0.010    | 1        |          |           |           |        |
|                                                                                                 | Neurocogn  | 0.117    | 0.046    | 0.650***  | 0.443**  | 0.414**  | 0.308*    | 0.746*** | 1        |           |           |        |
|                                                                                                 | Autonomic  | 0.168    | 0.205    | 0.496***  | 0.472*** | 0.524*** | 0.038     | 0.835*** | 0.666*** | 1         |           |        |
|                                                                                                 | Neuroend   | -0.034   | -0.180   | 0.460**   | 0.053    | 0.105    | 0.724***  | 0.147    | 0.263    | 0.294*    | 1         |        |
| Immune                                                                                          | 0.243      | -0.021   | 0.407**  | 0.060     | 0.480*** | 0.156    | 0.719***  | 0.410**  | 0.762*** | 0.335*    | 1         |        |
| <b>ME/CFS_SA-<br/>pattern 2<br/>Stable<br/>repertoire<br/>(n = 7)</b>                           | HSV-1      | 1        |          |           |          |          |           |          |          |           |           |        |
|                                                                                                 | EBV        | 0.597*** | 1        |           |          |          |           |          |          |           |           |        |
|                                                                                                 | HHV-6B     | -0.200   | -0.261   | 1         |          |          |           |          |          |           |           |        |
|                                                                                                 | HHV-7      | -0.412** | -0.453** | 0.176     | 1        |          |           |          |          |           |           |        |
|                                                                                                 | PEM        | -0.016   | 0.288    | -0.240    | -0.324*  | 1        |           |          |          |           |           |        |
|                                                                                                 | Sleepdysf  | 0.146    | 0.256    | -0.033    | -0.103   | 0.251    | 1         |          |          |           |           |        |
|                                                                                                 | Pain       | 0.160    | 0.476**  | -0.594*** | -0.055   | 0.467**  | 0.322*    | 1        |          |           |           |        |
|                                                                                                 | Neurocogn  | 0.260    | 0.401**  | -0.431**  | -0.306*  | 0.358*   | 0.213     | 0.557*** | 1        |           |           |        |
|                                                                                                 | Autonomic  | 0.316*   | 0.389*   | -0.250    | -0.170   | 0.246    | 0.697***  | 0.354*   | 0.429**  | 1         |           |        |
|                                                                                                 | Neuroend   | 0.005    | 0.262    | -0.415**  | -0.146   | 0.549*** | 0.538***  | 0.624*** | 0.556*** | 0.611***  | 1         |        |
| Immune                                                                                          | 0.088      | 0.183    | -0.157   | -0.145    | 0.388*   | 0.169    | 0.471**   | 0.590*** | 0.298    | 0.388*    | 1         |        |
| <b>ME/CFS_<br/>acute illness<br/>episode<br/>(ME/CFS_SA<br/>; n=6,<br/>ME/CFS_M<br/>M; n=1)</b> | HSV-1      | 1        |          |           |          |          |           |          |          |           |           |        |
|                                                                                                 | EBV        | -0.111   | 1        |           |          |          |           |          |          |           |           |        |
|                                                                                                 | HHV-6B     | 0.292    | 0.139    | 1         |          |          |           |          |          |           |           |        |
|                                                                                                 | HHV-7      | -0.306   | 0.003    | 0.548**   | 1        |          |           |          |          |           |           |        |
|                                                                                                 | PEM        | -0.409   | -0.428*  | -0.647**  | -0.089   | 1        |           |          |          |           |           |        |
|                                                                                                 | Sleepdysf  | 0.205    | 0.504*   | 0.454*    | 0.211    | -0.321   | 1         |          |          |           |           |        |
|                                                                                                 | Pain       | -0.016   | -0.203   | -0.426*   | -0.226   | 0.625**  | 0.258     | 1        |          |           |           |        |
|                                                                                                 | Neurocogn  | 0.325    | 0.112    | 0.059     | -0.382   | -0.294   | 0.314     | 0.239    | 1        |           |           |        |
|                                                                                                 | Autonomic  | -0.179   | 0.204    | -0.195    | 0.019    | 0.300    | 0.381     | 0.380    | 0.130    | 1         |           |        |
|                                                                                                 | Neuroend   | -0.260   | 0.306    | 0.268     | 0.315    | -0.066   | 0.526*    | 0.133    | 0.070    | 0.517*    | 1         |        |
| Immune                                                                                          | 0.228      | -0.384   | -0.122   | -0.043    | 0.597**  | 0.140    | 0.564**   | -0.063   | 0.376    | 0.129     | 1         |        |

**Supplementary Figures**



**ME/CFS RESEARCH PROJECT**  
**SYMPTOMS ASSESSMENT – DAY 1 of acute illness or significant**  
**worsening of symptoms**

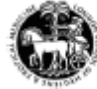

|                                                                    |                                                   |
|--------------------------------------------------------------------|---------------------------------------------------|
| Sex: Male <input type="checkbox"/> Female <input type="checkbox"/> | Project ID N° <small>(For LSHTM use only)</small> |
| Date of birth: ___/___/___ (dd/mm/yyyy)                            | Today's date: ___/___/___ (dd/mm/yyyy)            |

A. Please describe your current illness or worsening of symptoms.

\_\_\_\_\_

\_\_\_\_\_

\_\_\_\_\_

1. How much time during the past week...

|                                                               | None of the time | A little of the time | Some of the time | A good bit of the time | Most of the time | All of the time |
|---------------------------------------------------------------|------------------|----------------------|------------------|------------------------|------------------|-----------------|
| Did you feel worn out?                                        | 0                | 1                    | 2                | 3                      | 4                | 5               |
| Did you have a lot of energy?                                 | 0                | 1                    | 2                | 3                      | 4                | 5               |
| Did you feel tired?                                           | 0                | 1                    | 2                | 3                      | 4                | 5               |
| Did you have enough energy to do the things you wanted to do? | 0                | 1                    | 2                | 3                      | 4                | 5               |
| Did you feel full of pep (lively)?                            | 0                | 1                    | 2                | 3                      | 4                | 5               |

2. Please mark the line with an 'X' to describe the severity of pain that you are currently experiencing (think of the last week including today), from no pain at all (mark on the left of the line) to maximum pain (mark on the right of the line).

**No pain** **Pain as bad as possible**

\_\_\_\_\_

3. Please mark the line with an 'X' to describe the severity of fatigue that you are currently experiencing (think of the last week including today), from no fatigue at all (mark on the left of the line) to maximum fatigue (mark on the right of the line).

**No fatigue** **Fatigue as bad as possible**

\_\_\_\_\_

Please mark the next two lines thinking about how much of that fatigue is physical and how much is mental.

**No physical fatigue** **Physical fatigue as bad as possible**

\_\_\_\_\_

**No mental fatigue** **Mental fatigue as bad as possible**

\_\_\_\_\_

4. Please tick the boxes using the scale above them to tell us more about which of the symptoms listed below you have had over the past week:

|                                                                                                   | Absent                   | Mild                     | Moderate                 | Severe                   |
|---------------------------------------------------------------------------------------------------|--------------------------|--------------------------|--------------------------|--------------------------|
| 1. Sore throat                                                                                    | <input type="checkbox"/> | <input type="checkbox"/> | <input type="checkbox"/> | <input type="checkbox"/> |
| 2. Symptoms of flu                                                                                | <input type="checkbox"/> | <input type="checkbox"/> | <input type="checkbox"/> | <input type="checkbox"/> |
| 3. Fever or chills                                                                                | <input type="checkbox"/> | <input type="checkbox"/> | <input type="checkbox"/> | <input type="checkbox"/> |
| 4. Tender glands in the neck or arm pit                                                           | <input type="checkbox"/> | <input type="checkbox"/> | <input type="checkbox"/> | <input type="checkbox"/> |
| 5. Viral infections                                                                               | <input type="checkbox"/> | <input type="checkbox"/> | <input type="checkbox"/> | <input type="checkbox"/> |
| 6. Sensitivities to food, medications, chemicals, smells/odours, and/or other                     | <input type="checkbox"/> | <input type="checkbox"/> | <input type="checkbox"/> | <input type="checkbox"/> |
| 6.a. Intolerance to alcohol (alcohol makes you feel ill/much worse)                               | <input type="checkbox"/> | <input type="checkbox"/> | <input type="checkbox"/> | <input type="checkbox"/> |
| 7. Feeling ill (malaise) after exertion/activity which lasts for a long time (more than 24 hours) | <input type="checkbox"/> | <input type="checkbox"/> | <input type="checkbox"/> | <input type="checkbox"/> |
| 8. Pain after exertion/activity which lasts for a long time (more than 24 hours)                  | <input type="checkbox"/> | <input type="checkbox"/> | <input type="checkbox"/> | <input type="checkbox"/> |
| 9. Muscle pain                                                                                    | <input type="checkbox"/> | <input type="checkbox"/> | <input type="checkbox"/> | <input type="checkbox"/> |
| 10. Muscle discomfort                                                                             | <input type="checkbox"/> | <input type="checkbox"/> | <input type="checkbox"/> | <input type="checkbox"/> |
| 10.a. Muscle twitching                                                                            | <input type="checkbox"/> | <input type="checkbox"/> | <input type="checkbox"/> | <input type="checkbox"/> |
| 11. Stiffness in the mornings                                                                     | <input type="checkbox"/> | <input type="checkbox"/> | <input type="checkbox"/> | <input type="checkbox"/> |
| 11.a. Pain in chest or abdomen                                                                    | <input type="checkbox"/> | <input type="checkbox"/> | <input type="checkbox"/> | <input type="checkbox"/> |
| 12. Pain in two or more joints, without swelling or redness                                       | <input type="checkbox"/> | <input type="checkbox"/> | <input type="checkbox"/> | <input type="checkbox"/> |
| 13. Joint pains moving to different joints without swelling or redness                            | <input type="checkbox"/> | <input type="checkbox"/> | <input type="checkbox"/> | <input type="checkbox"/> |

|                                                                                                                                             |  |  |  |  |
|---------------------------------------------------------------------------------------------------------------------------------------------|--|--|--|--|
| 14. Neck weakness                                                                                                                           |  |  |  |  |
| 15. Back weakness                                                                                                                           |  |  |  |  |
| 16. Air hunger, difficulty in breathing or shortness of breath on exertion/activity                                                         |  |  |  |  |
| 17. Muscle weakness                                                                                                                         |  |  |  |  |
| 18. Headaches which are new, different or worse than before the disease started                                                             |  |  |  |  |
| 19. Migraine which is different/worse than before                                                                                           |  |  |  |  |
| 20. Unusual sensitivity to light and/or noise                                                                                               |  |  |  |  |
| 21. Temporary disturbance in eyesight                                                                                                       |  |  |  |  |
| 22. Tingling or numbness in arms and/or legs                                                                                                |  |  |  |  |
| 23. Loss of balance, unsteadiness on feet when standing, or inability to focus the vision                                                   |  |  |  |  |
| 24. Poor coordination or unsteady movements (unsteadiness on walking)                                                                       |  |  |  |  |
| 25. Short term memory problems                                                                                                              |  |  |  |  |
| 26. Trouble concentrating                                                                                                                   |  |  |  |  |
| 27. Confusion or 'brain fog'                                                                                                                |  |  |  |  |
| 28. Disorientation                                                                                                                          |  |  |  |  |
| 29. Difficulty understanding things, thinking clearly                                                                                       |  |  |  |  |
| 29.a. Difficulty finding or saying words                                                                                                    |  |  |  |  |
| 30. Difficulty retaining/ recalling information                                                                                             |  |  |  |  |
| 31. Slow thinking                                                                                                                           |  |  |  |  |
| 31a. Difficulty making decisions                                                                                                            |  |  |  |  |
| 32. Unrefreshing sleep                                                                                                                      |  |  |  |  |
| 33. Problems in sleep quality or duration (other than sleep apnoea), such as insomnia, changing night for day, awakening during the night   |  |  |  |  |
| 34. Marked physical or mental fatigue or exhaustion after minimal exertion/activity, which lasts for a long time (more than 24 hours)       |  |  |  |  |
| 35. Fatigue or exhaustion after levels of activity that should normally not cause fatigue (i.e. would not cause fatigue before you got ill) |  |  |  |  |
| 36. Intolerance to exercise (it is difficult to exercise)                                                                                   |  |  |  |  |
| 37. Worsening of symptoms after exertion/activity, which lasts for a long time (more than 24 hours)                                         |  |  |  |  |
| 38. Worsening of symptoms with stress                                                                                                       |  |  |  |  |

|                                                                                                                                                          |  |  |  |  |
|----------------------------------------------------------------------------------------------------------------------------------------------------------|--|--|--|--|
| 39. Intolerance to (difficulty with) standing on your feet                                                                                               |  |  |  |  |
| 40. Dizziness while standing up                                                                                                                          |  |  |  |  |
| 41. Palpitations while standing up                                                                                                                       |  |  |  |  |
| 41a. Palpitations (feeling that your heart is racing or pounding)                                                                                        |  |  |  |  |
| 42. Feeling light-headed                                                                                                                                 |  |  |  |  |
| 43. Being extremely pale                                                                                                                                 |  |  |  |  |
| 44. Being unusually sweaty                                                                                                                               |  |  |  |  |
| 44a. Unusually cold hands or feet                                                                                                                        |  |  |  |  |
| 45. Intolerance to extremes of heat and cold                                                                                                             |  |  |  |  |
| 46. Feeling sick (nausea)                                                                                                                                |  |  |  |  |
| 46. a. Irritable bowel symptoms, such as diarrhoea or constipation, abdominal pain, and bloating                                                         |  |  |  |  |
| 47. Bladder problems, such as having a sudden need to urinate (pass water), urinating more often than usual, or waking up during the night to pass water |  |  |  |  |
| 48. Decreased sexual interest and/or function                                                                                                            |  |  |  |  |
| 49. Abnormal appetite or significant changes in weight (not intentional)                                                                                 |  |  |  |  |

END OF FORM - If you have any queries, please phone the research nurse on 020 7XXX XXXX and she will be happy to help you.

*Thank you for continuing to participate!*

**Supplementary Figure 1. Clinical symptom assessment forms.** The form was completed by the participant at the time that each saliva sample was collected and returned, i.e. at Month 1, 2, 3, 4, 5 and 6 and then there was an disease exacerbation episode.

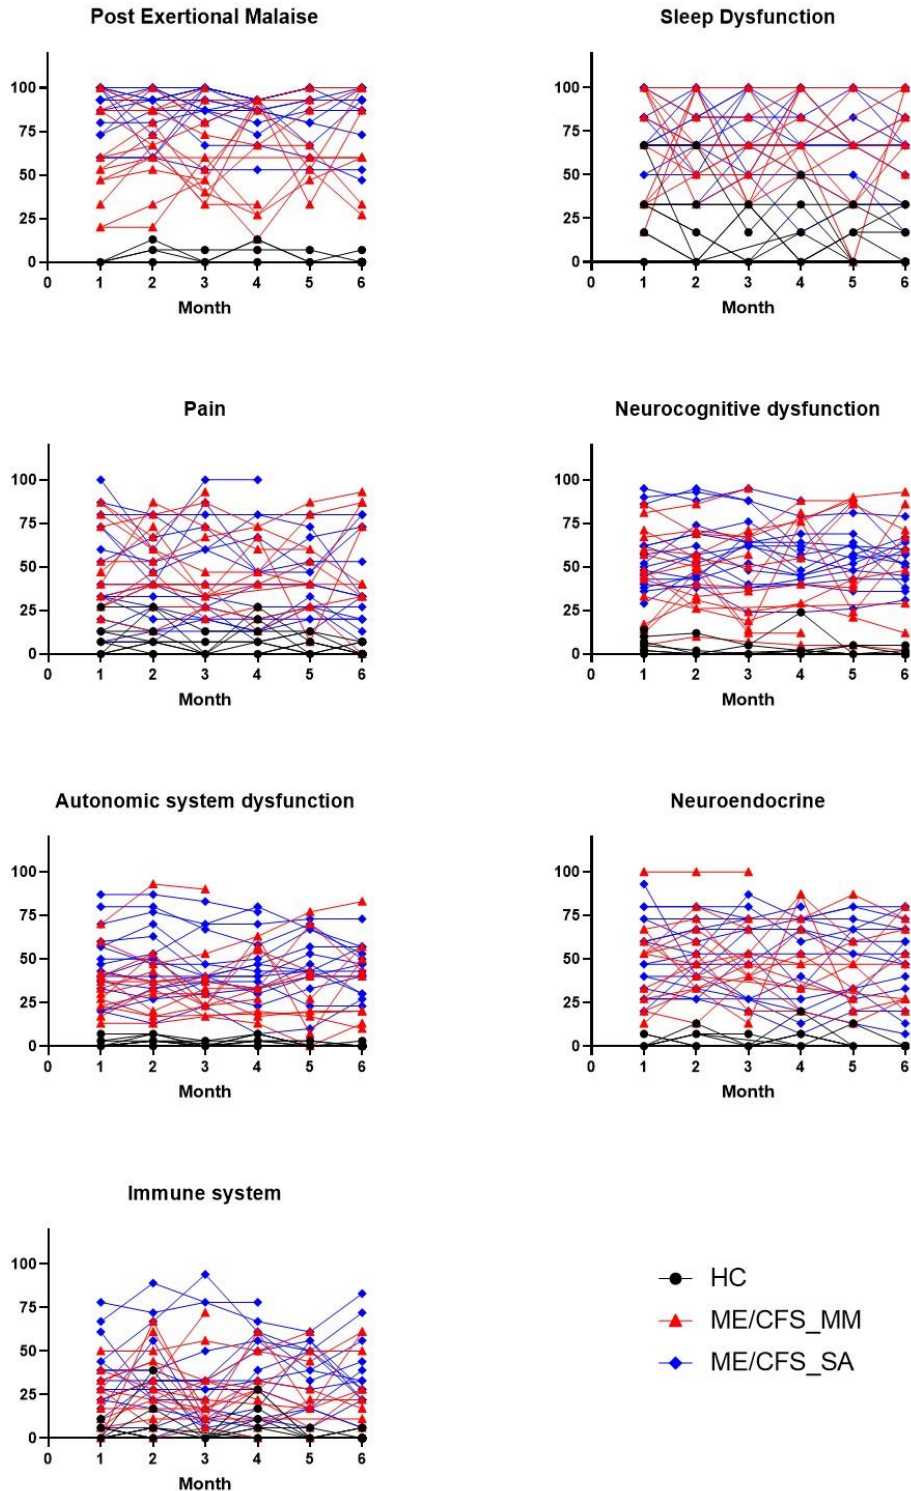

**Supplementary Figure 2: Reported symptoms at monthly intervals in participants with mild/moderate (red) or severe (blue) ME/CFS or from healthy controls. Self-reported symptoms were submitted via questionnaire, with weighted responses determined under each symptom domain for each participant at each time point, on a scale of 1 – 100.**

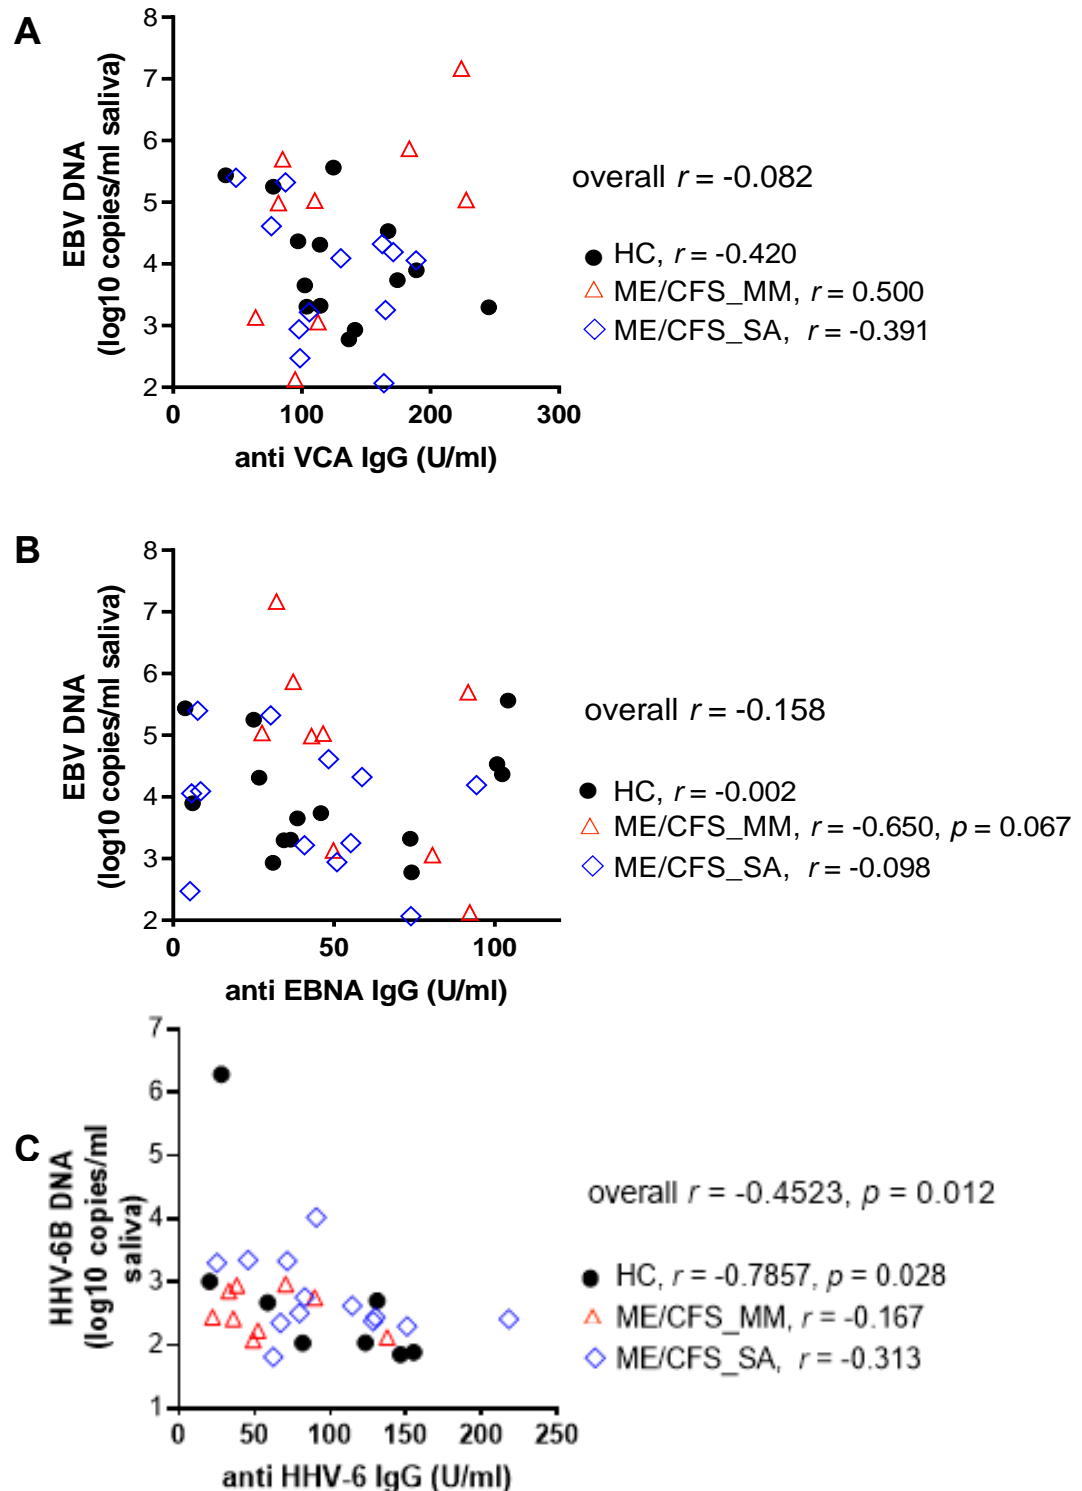

**Supplementary Figure 3. Correlation analysis between salivary HHV viral DNA concentration and anti HHV IgG titre.** (A) EBV viral DNA concentration with anti VCA IgG (B) EBV viral DNA concentration with anti EBNA IgG (C) HHV-6B viral load with anti HHV-6 IgG. Average viral DNA concentration measured monthly for 6 months was analysed with previously measured plasma anti HHV IgG level. Spearman's coefficient was denoted as  $r$ . \*,  $p < 0.05$ . Zero DNA concentration values are not shown due to the logarithmic values but were included in the analysis.

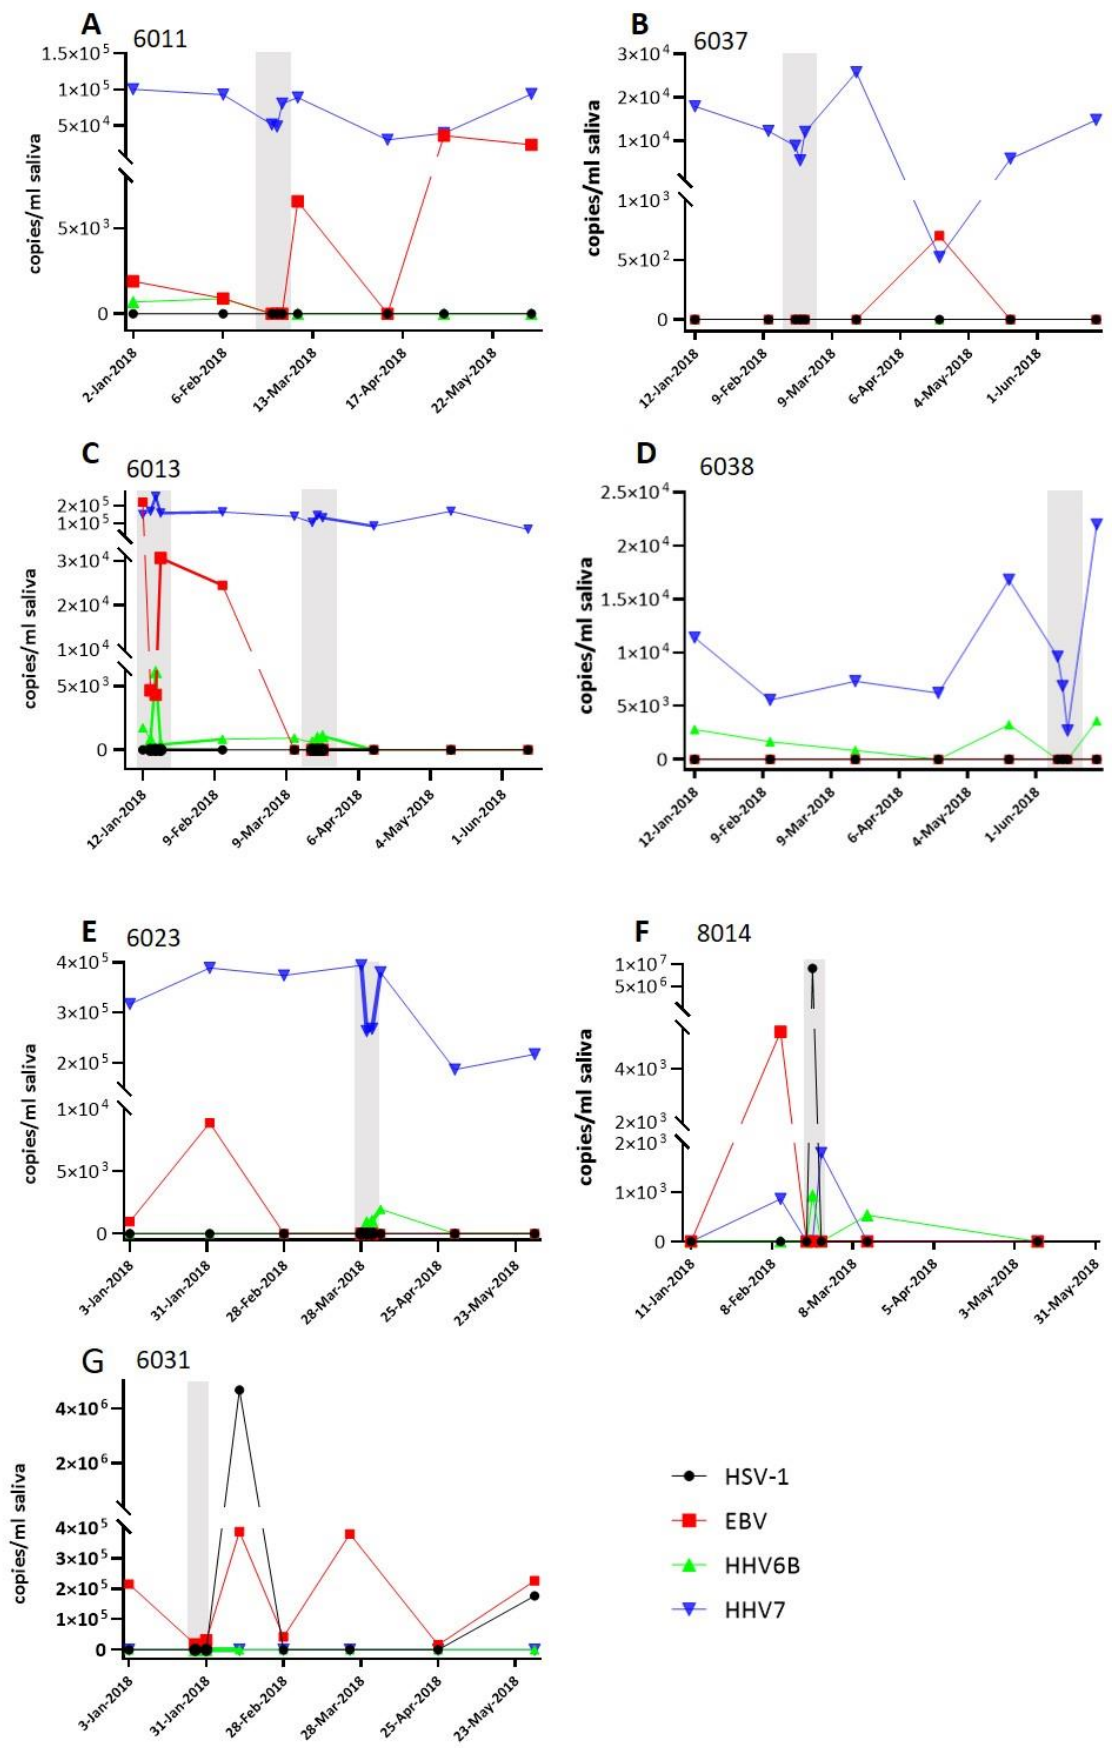

Supplementary Figure 4. Change of HHV viral DNA concentrations in people with ME/CFS (n=7) who had acute illness or worsening disease severity (highlighted in grey).

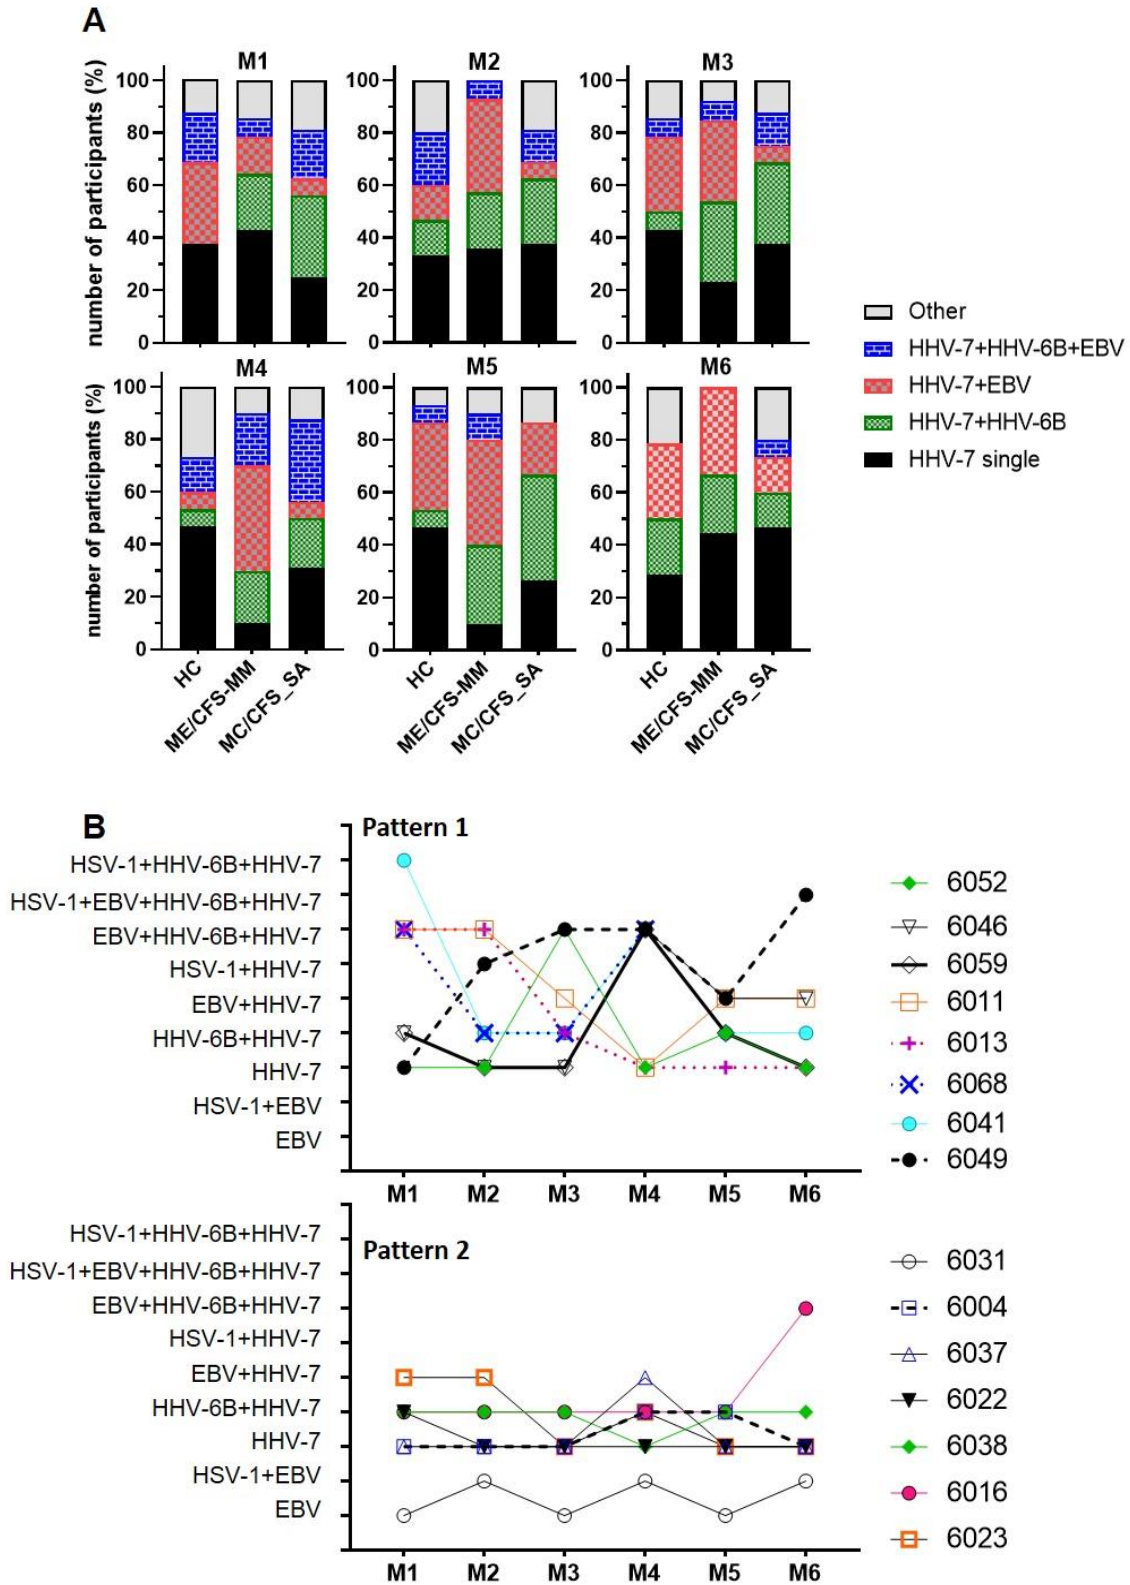

**Supplementary Figure 5. Concurrent salivary HHV distribution over time.** A) Distribution of different combinations of HHV DNA detected in saliva from participants with mild/moderate (MM) or severe (SA) ME/CFS and healthy controls (HC). B) Severely affected ME/CFS patients had either fluctuating HHV DNA repertoires (Pattern 1) or more constant repertoires (Pattern 2).

**A**

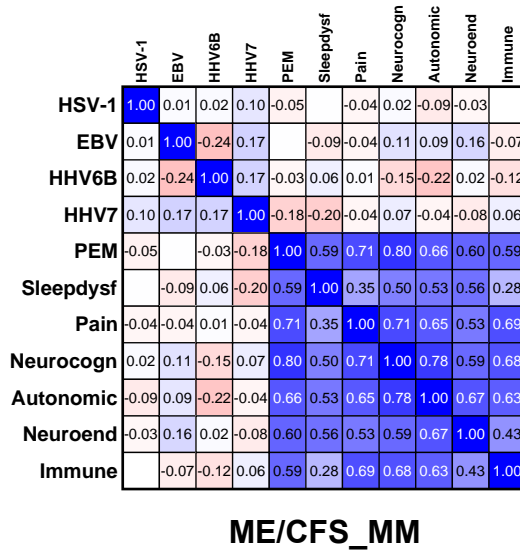

**B**

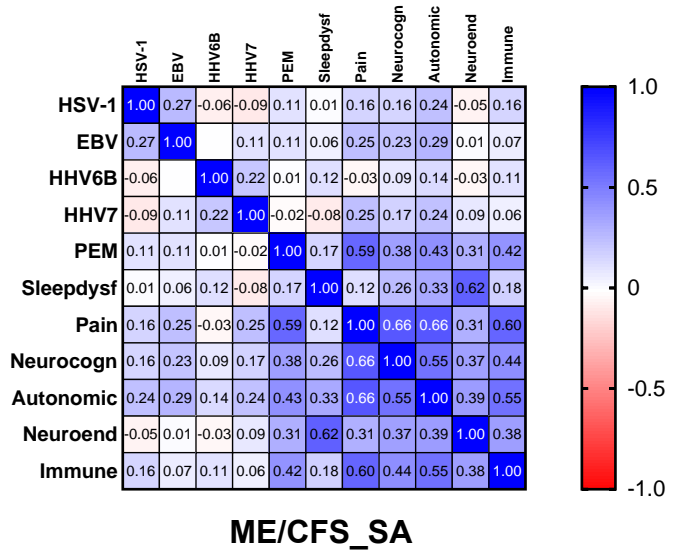

**C**

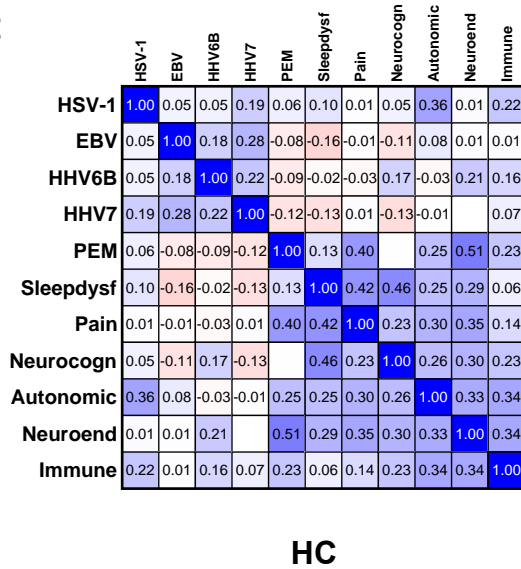

**Supplementary Figure 6. Correlation matrixes of seven typical symptoms domains of ME/CFS with HHV viral DNA concentration in saliva from people with ME/CFS. Correlation efficient between HHV viral loads and symptoms scores across 6 months in (A) ME/CFS\_MM, (B) ME/CFS\_SA and HC (C)**

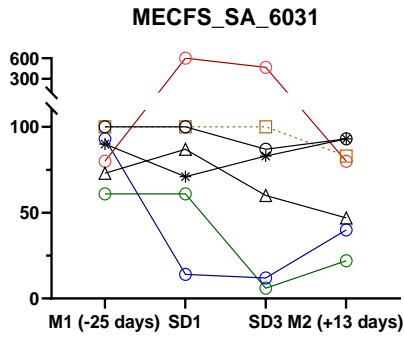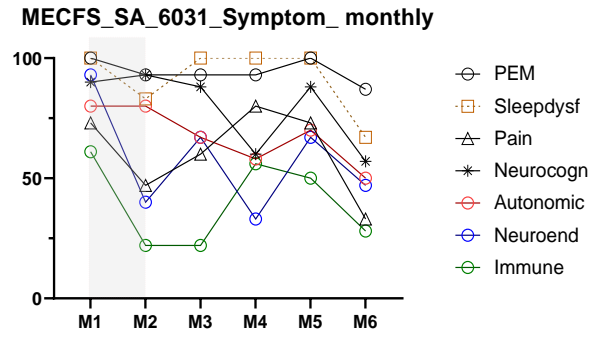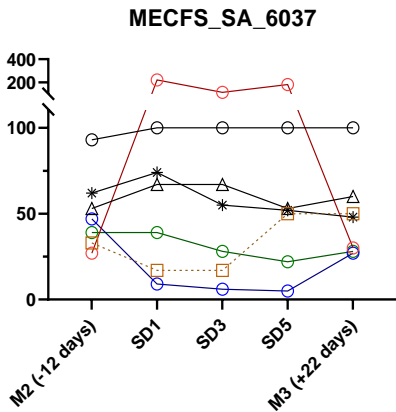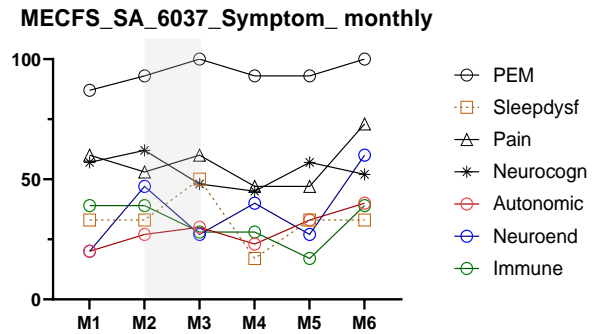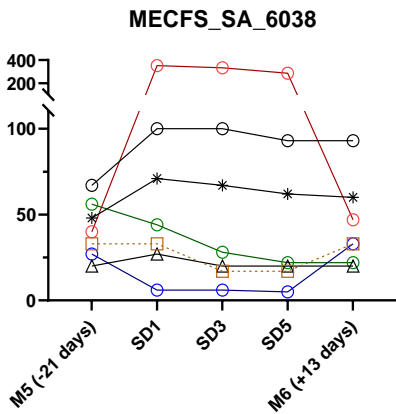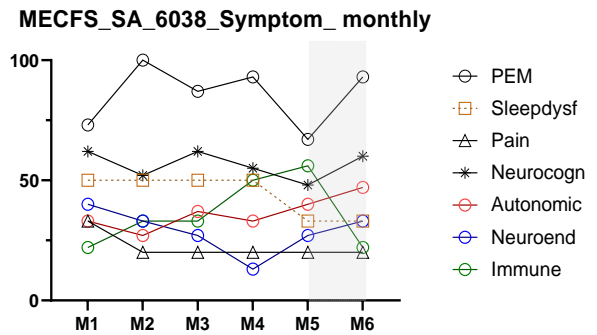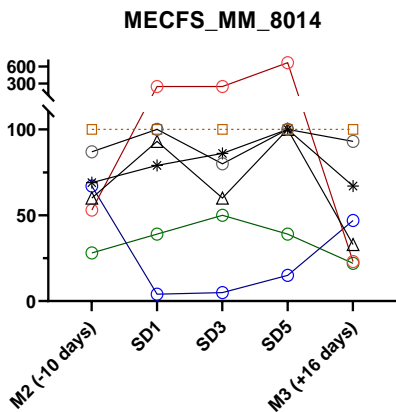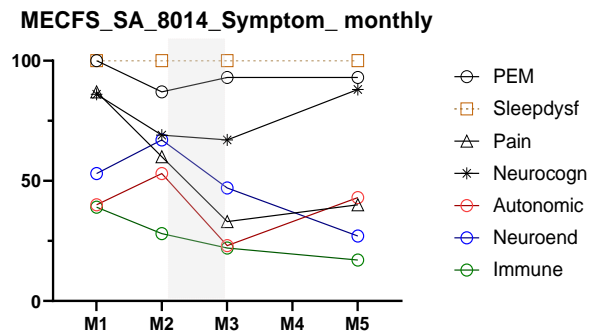

**Supplementary Figure 7. Change of symptoms score in people with ME/CFS (n=7) who had acute illness or worsening of disease symptoms. Sick days (left panel) and monthly (right panel). Sick days occurred in the light grey area.**
